# Supplementary material
Source: PubMed Central journal article supplement (PMC6699549)
Supplement: JGMED19001071.pdf [file JGMED19001071.pdf]

**Supplemental Material A:  
Assessment Tools**

**1. Itemized Checklist**

**Subject:**

**Reviewer:**

| Procedure Step                                                                                                                                               | Successfully Completed?  |                          |
|--------------------------------------------------------------------------------------------------------------------------------------------------------------|--------------------------|--------------------------|
|                                                                                                                                                              | Yes                      | No                       |
| 1. Appropriately applies sterile solution<br>(At least two passes with sterile solution in circular fashion, moving from centre outwards, new swab per pass) | <input type="checkbox"/> | <input type="checkbox"/> |
| 2. Correctly drapes patient in a sterile fashion<br>(Appropriate use of sterile drapes, with appropriate field of view)                                      | <input type="checkbox"/> | <input type="checkbox"/> |
| 3. Appropriately utilizes anatomic landmarks for technique<br>(Clearly utilizes landmarks)                                                                   | <input type="checkbox"/> | <input type="checkbox"/> |
| 4. Competently inserts angiocatheter or steel needle into IJ vein<br>(Needle advanced at 30-45 degrees, towards ipsilateral nipple)                          | <input type="checkbox"/> | <input type="checkbox"/> |
| 5. Safely inserts guide wire<br>(Advances J-wire into vein, J-tip first, avoids excess pressure, maintains control of the wire, maintains control of needle) | <input type="checkbox"/> | <input type="checkbox"/> |
| 6. Effectively uses scalpel to make skin incision<br>(Single appropriate sized stab incision, dull side of blade along wire)                                 | <input type="checkbox"/> | <input type="checkbox"/> |
| 7. Smoothly passes dilator over wire and dilates IJ vein                                                                                                     | <input type="checkbox"/> | <input type="checkbox"/> |
| 8. Effectively inserts central venous catheter over wire<br>(Maintains direct visualization of wire at all times)                                            | <input type="checkbox"/> | <input type="checkbox"/> |
| 9. Adequately flushes all catheter lumens<br>(This may be done at start or end of procedure or combination)                                                  | <input type="checkbox"/> | <input type="checkbox"/> |

Lord JA, Zuege DJ, Mackay MP, Roze des Ordons A, Lockyer J. Picking the right tool for the job: a reliability study of 4 assessment tools for central venous catheter insertion. *J Grad Med Educ.* 2019;11(4):422–429.

## 2. Critical Error Tool

**Subject:**

**Reviewer:**

Please indicate whether any of the following critical errors were identified:

- i. Inadequate/inappropriate application of sterile solution
- ii. Inadequate/inappropriate application of sterile drapes
- iii. Critical mishandling of needle  
(e.g. no syringe, inappropriate depth, grossly incorrect direction)
- iv. Critical mishandling or loss of guidewire
- v. Not flushing all catheter lumens
- vi. Other (please identify) \_\_\_\_\_

Lord JA, Zuege DJ, Mackay MP, Roze des Ordons A, Lockyer J. Picking the right tool for the job: a reliability study of 4 assessment tools for central venous catheter insertion. *J Grad Med Educ.* 2019;11(4):422–429.

### 3. OSATS Tool

**Subject Number:**

**Reviewer:**

| <b>Specific components of technical ability:</b> | <b>Not competent to perform independently</b>                                     | <b>Borderline competent to perform independently</b> | <b>Competent to perform independently</b>                                     | <b>Above average to perform independently</b>                                          |
|--------------------------------------------------|-----------------------------------------------------------------------------------|------------------------------------------------------|-------------------------------------------------------------------------------|----------------------------------------------------------------------------------------|
| Time & Motion                                    | <input type="checkbox"/><br>Many unnecessary movements                            | <input type="checkbox"/>                             | <input type="checkbox"/><br>Efficient but some unnecessary movements          | <input type="checkbox"/><br>Economy of movement and maximum efficiency                 |
| Instrument handling                              | <input type="checkbox"/><br>Repeated awkward or tentative handling of instruments | <input type="checkbox"/>                             | <input type="checkbox"/><br>Competent, occasionally appeared stiff or awkward | <input type="checkbox"/><br>Fluid handling of instruments; no stiffness or awkwardness |
| Knowledge of Instruments                         | <input type="checkbox"/><br>Frequently used inappropriate instrument              | <input type="checkbox"/>                             | <input type="checkbox"/><br>Used appropriate instrument for task              | <input type="checkbox"/><br>Obviously familiar with required instruments               |
| Flow of Procedure                                | <input type="checkbox"/><br>Frequently stopped and seemed unsure of next step     | <input type="checkbox"/>                             | <input type="checkbox"/><br>Demonstrated reasonable progression of procedure  | <input type="checkbox"/><br>Obviously planned procedure; smooth flow                   |
| Knowledge of Specific Procedure                  | <input type="checkbox"/><br>Would have needed instruction to complete most steps  | <input type="checkbox"/>                             | <input type="checkbox"/><br>Seemed to know most steps of procedure            | <input type="checkbox"/><br>Demonstrated familiarity with all aspects of procedure     |

Lord JA, Zuege DJ, Mackay MP, Roze des Ordon A, Lockyer J. Picking the right tool for the job: a reliability study of 4 assessment tools for central venous catheter insertion. *J Grad Med Educ.* 2019;11(4):422–429.

#### 4. O-SCORE Tool

**Subject Number:**

**Reviewer:**

| <b>Overall Ability to Perform Procedure – Please circle candidate’s overall score</b> |                                                                                                                                                  |
|---------------------------------------------------------------------------------------|--------------------------------------------------------------------------------------------------------------------------------------------------|
| <b>Score</b>                                                                          | <b>Descriptor:</b>                                                                                                                               |
| 1                                                                                     | “I would have had to do it” (would have required complete hands on guidance) = NOT COMPETENT                                                     |
| 2                                                                                     | “I would have had to talk them through it” (able to perform tasks but would require constant direction and supervision) = NOT COMPETENT          |
| 3                                                                                     | “I would have had to prompt them from time to time” (some independence but with intermittent direction) = NOT COMPETENT                          |
| 4                                                                                     | “I would have needed to be in the room just in case” (independence but still required some supervision for safe practice) = BORDERLINE COMPETENT |
| 5                                                                                     | “I would not have needed to be in the room” (complete independence; performs safely; practice ready) = COMPETENT                                 |

Lord JA, Zuege DJ, Mackay MP, Roze des Ordon A, Lockyer J. Picking the right tool for the job: a reliability study of 4 assessment tools for central venous catheter insertion. *J Grad Med Educ.* 2019;11(4):422–429.

### Supplemental Material B: Study Design Layout

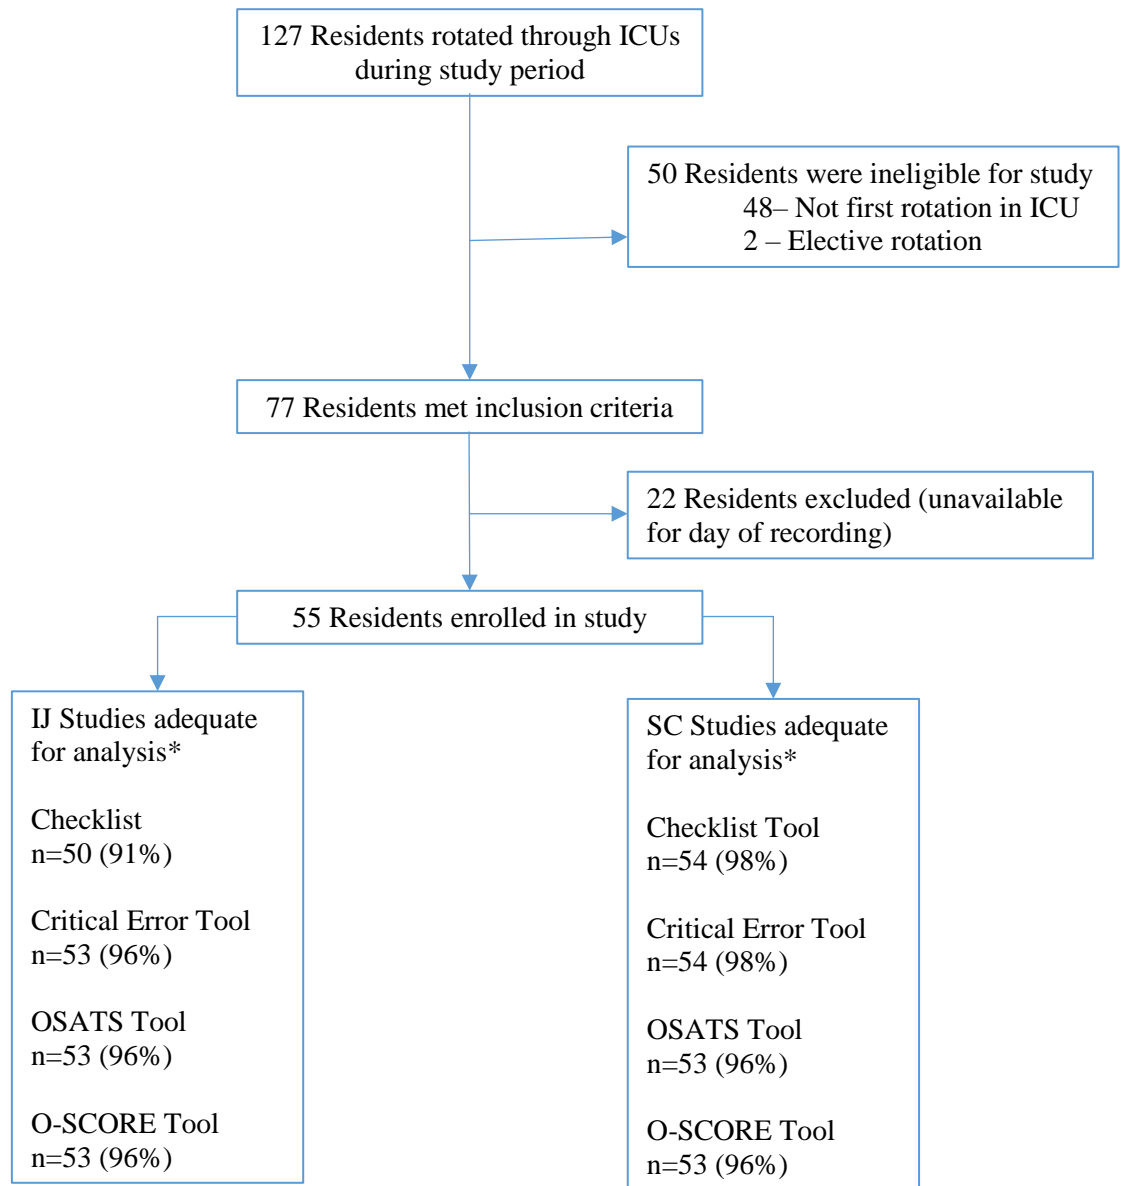

\*Proportion of video recordings that were adequate for analysis. Technical difficulties with the task-trainers or video recording procedure excluded some residents for analysis at each anatomical site
